# Supplementary material for: Islet-expressed circular RNAs are associated with type 2 diabetes status in human primary islets and in peripheral blood
Source: PubMed Central journal article supplement (PMC7171860; doi:10.1186/s12920-020-0713-2), 2020-04-20

**(A)**

CircCTBP1  
NM\_001012614

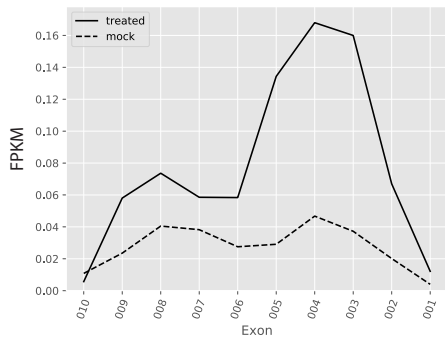

CircGLIS3  
NM\_001042413.2.2

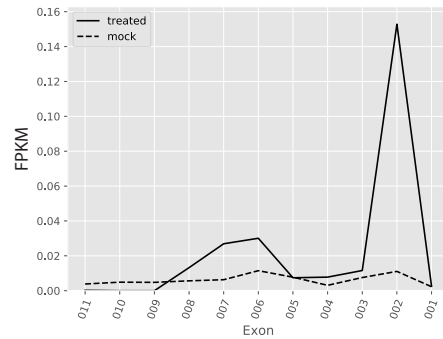

CircHMG20A  
NM\_018200.7.5

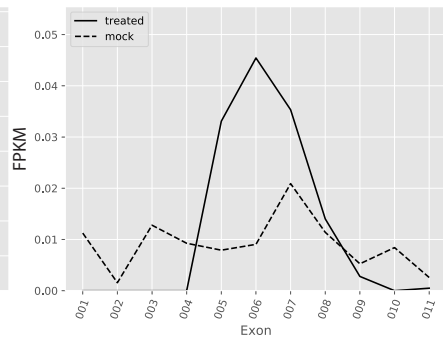

CircIDE1  
NM\_004969

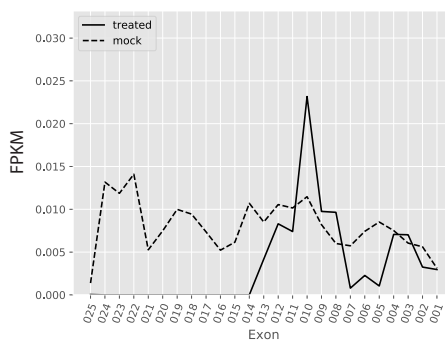

CircSPPL3  
NM\_139015

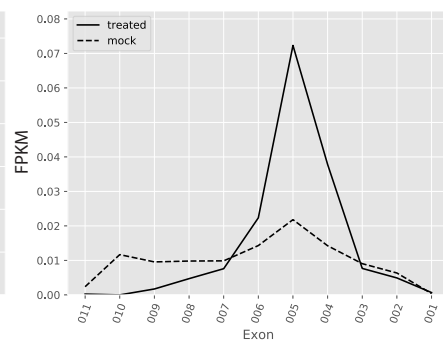

CircTHADA1,2,3,5  
NM\_022065

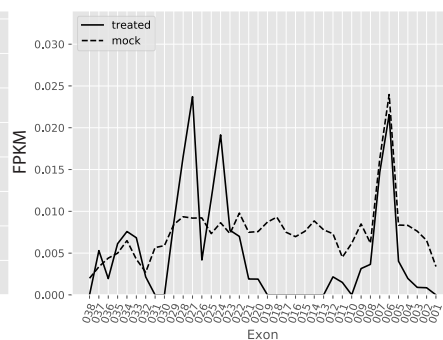

CircTHADA4  
NM\_001271643.9.4

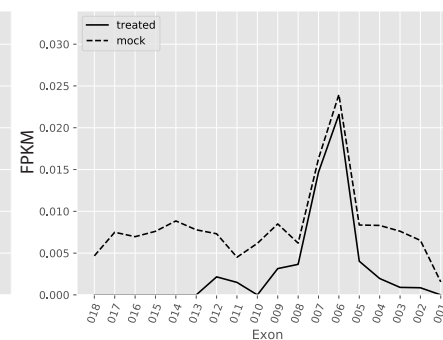**(B)**

CircCAMSAP1  
NM\_015447.3.2

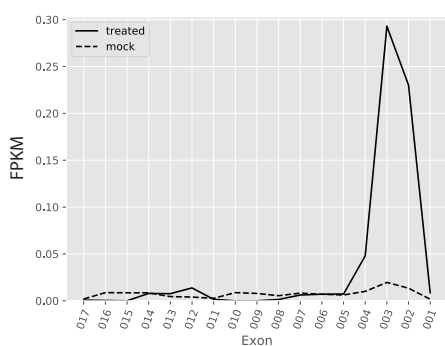

CircCIRBP  
NM\_001280.6.4

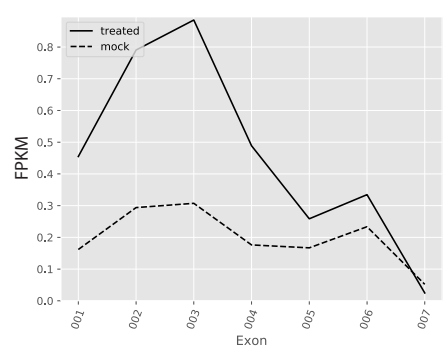

CircRHOBTB3  
NM\_014899.7.6

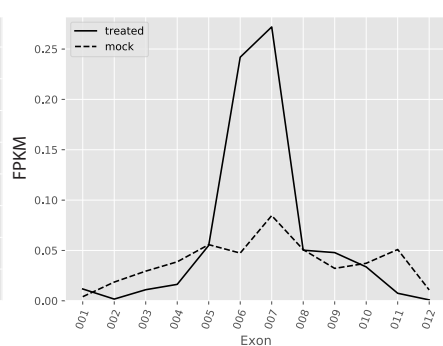

CircRPH3AL  
NM\_001190411.5.2

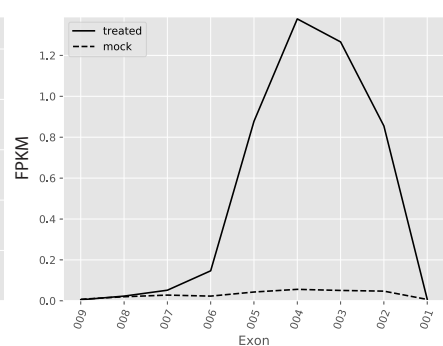

CircZSCAN1  
NM\_003439.3.2

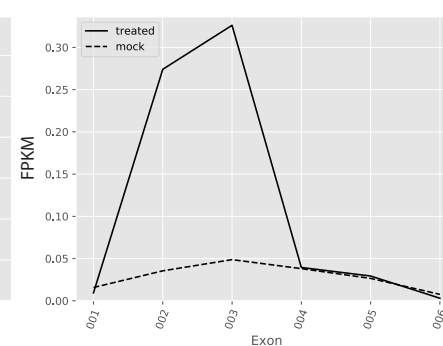

Supplement: 12920_2020_713_MOESM1_ESM.pdf [file 12920_2020_713_MOESM1_ESM.pdf]
