# Supplementary material for: Islet-expressed circular RNAs are associated with type 2 diabetes status in human primary islets and in peripheral blood
Source: PubMed Central journal article supplement (PMC7171860; doi:10.1186/s12920-020-0713-2), 2020-04-20
Supplement: 12920_2020_713_MOESM2_ESM.pdf [file 12920_2020_713_MOESM2_ESM.pdf]

**A.**

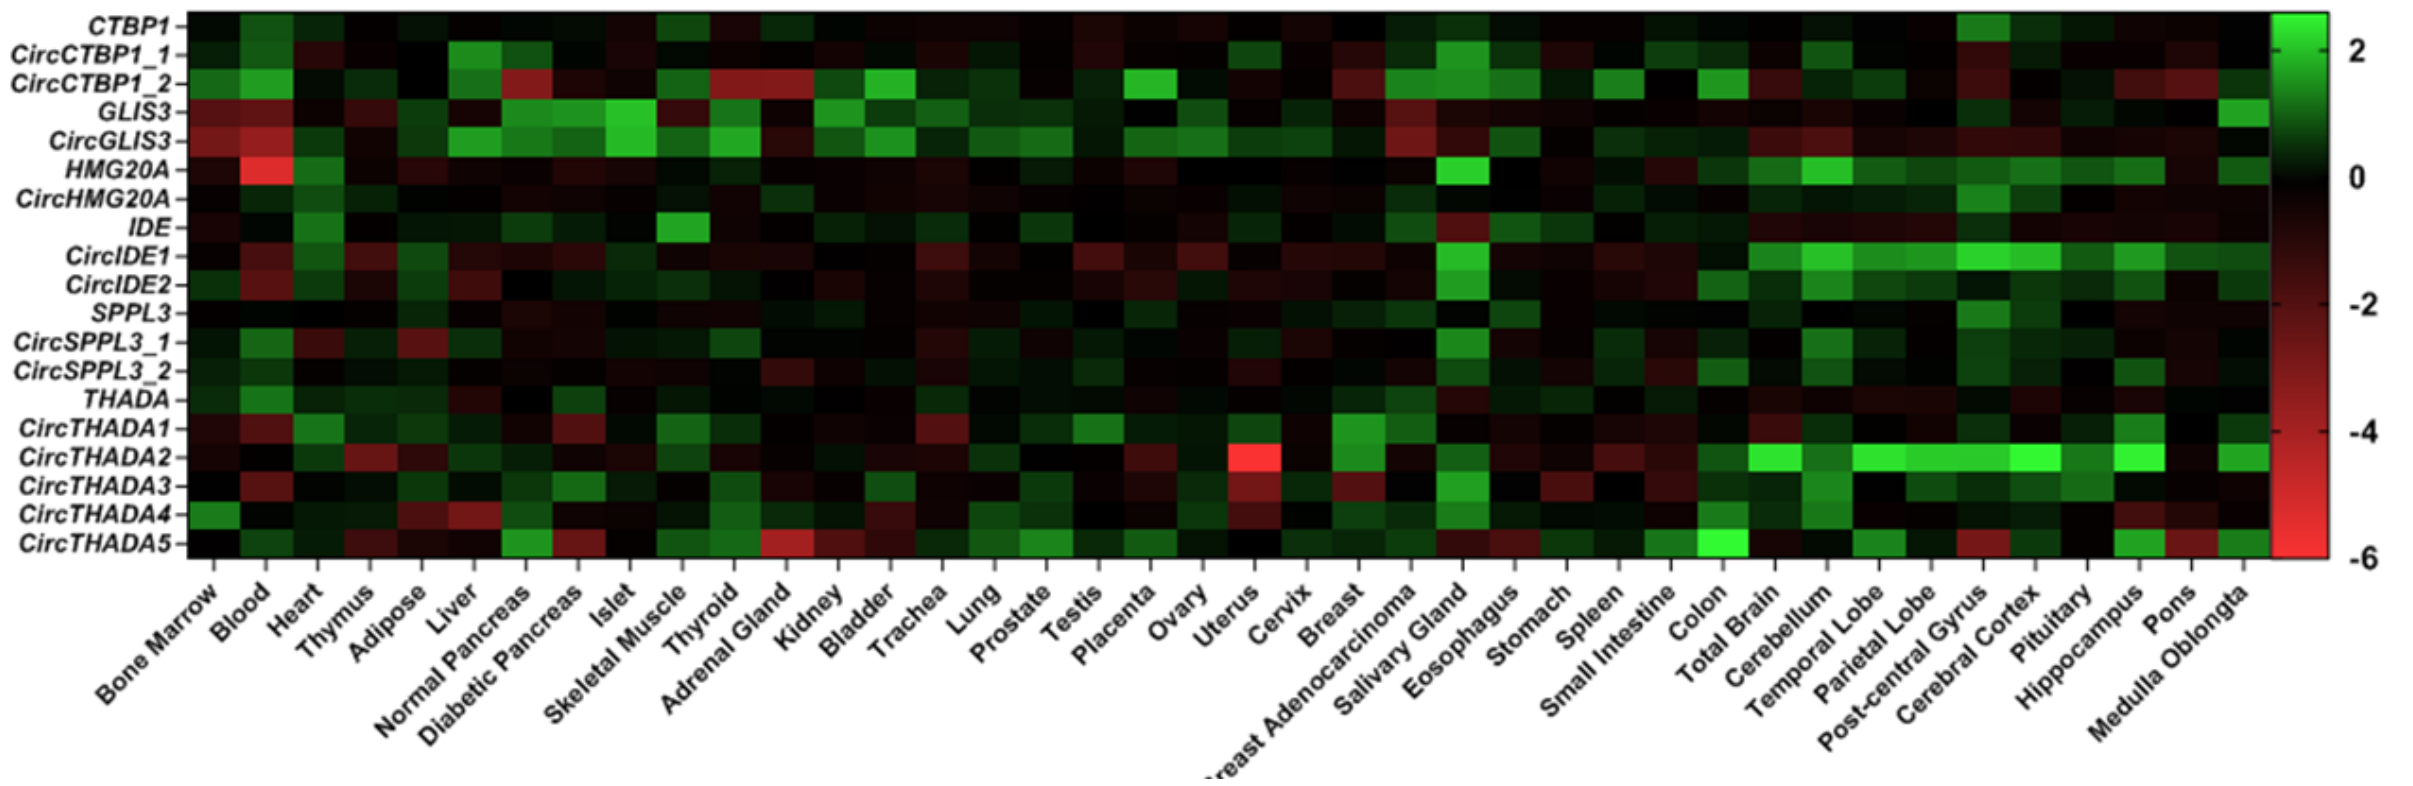

**B.**

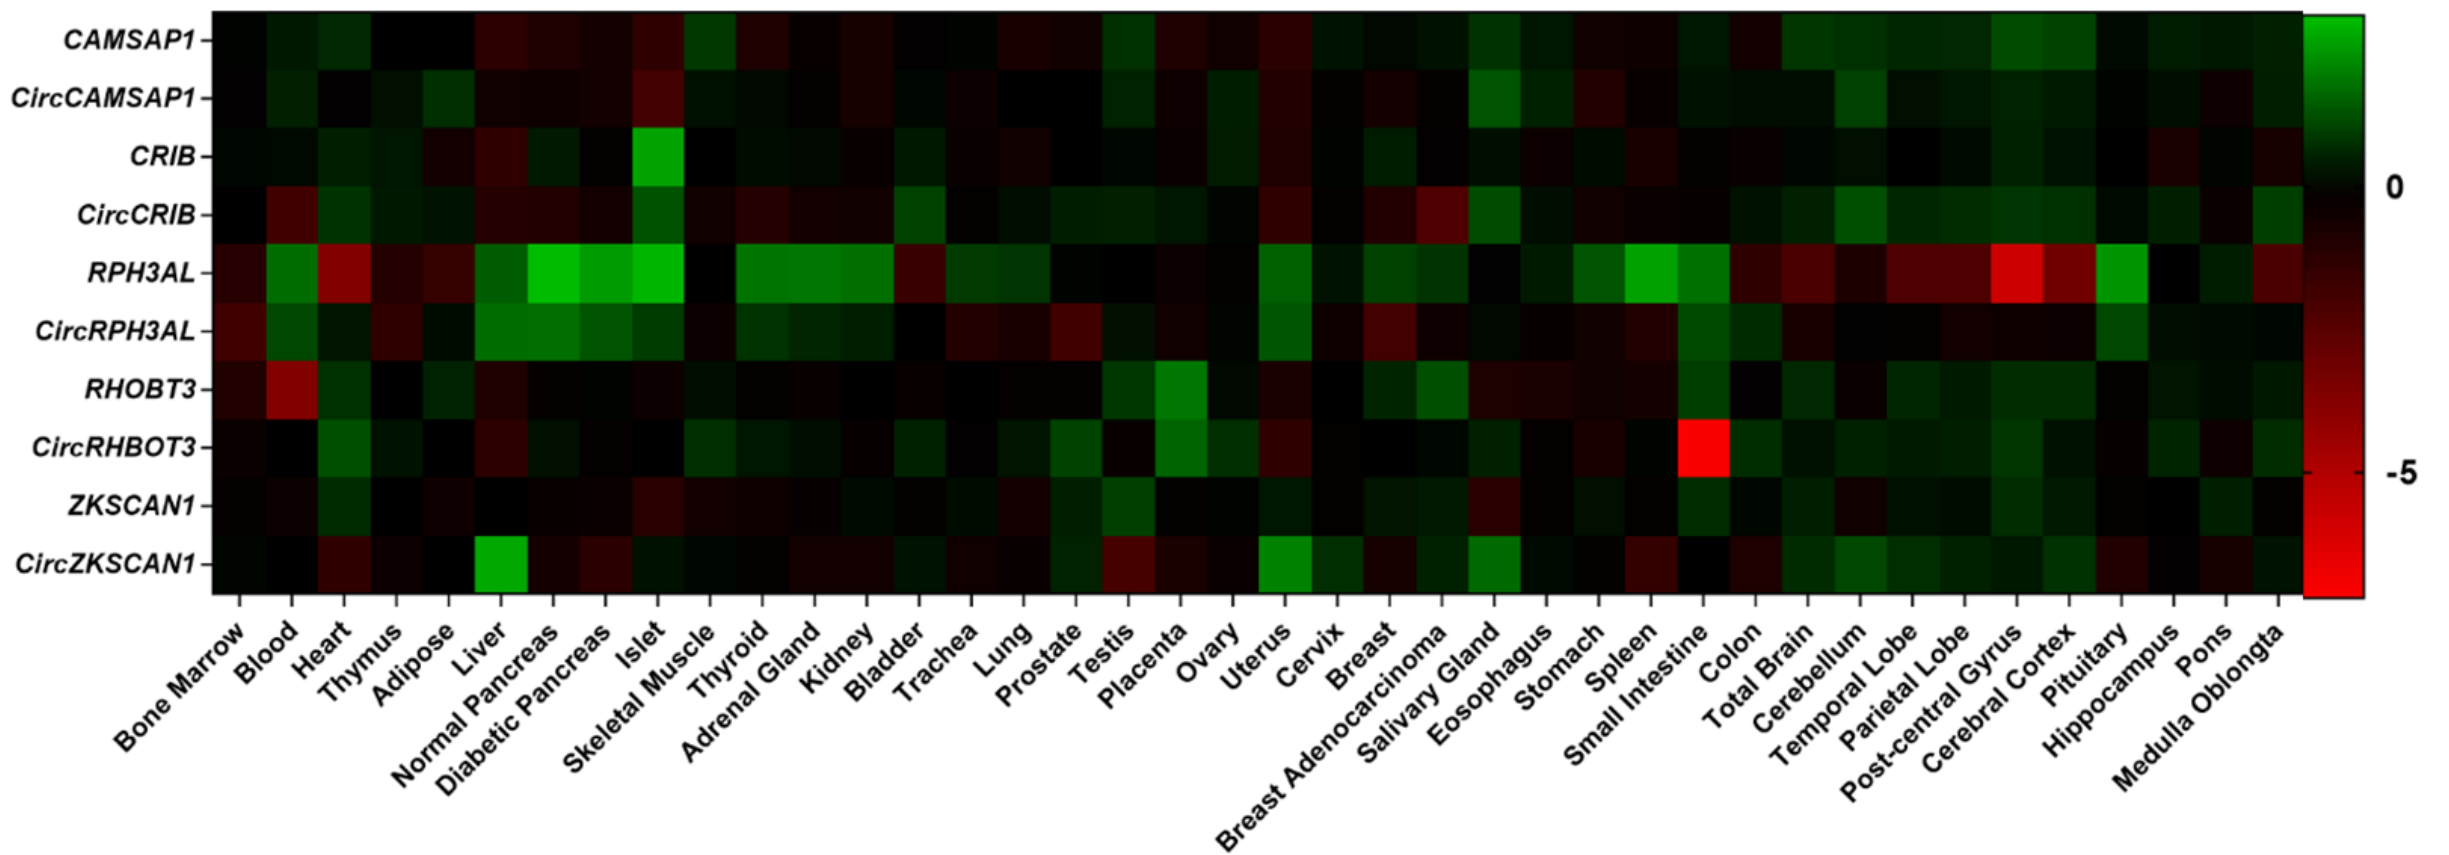

**Supplementary figure S2: Tissue profile of islet and GWAS-located circRNAs**

Relative expression of circRNA and their cognate transcripts have been assessed in different tissue samples. The expression profile of 13 GWAS-localizing circRNAs are shown in **(A)** and 5 most abundant circRNAs are shown in **(B)** alongside their linear counterparts RNA.
