# Supplementary material for: Islet-expressed circular RNAs are associated with type 2 diabetes status in human primary islets and in peripheral blood
Source: PubMed Central journal article supplement (PMC7171860; doi:10.1186/s12920-020-0713-2), 2020-04-20
Supplement: 12920_2020_713_MOESM3_ESM.pdf [file 12920_2020_713_MOESM3_ESM.pdf]

**Supplementary table S1: Details of individual islet preps used in this study.** The specifics of each islet prep used in this study are given below. '1' refers to islets used in the comparison of circRNA levels in relation to Type 2 diabetes (T2D) status. '2' refers to islets used in the correlation of circRNA expression with genotype at GWAS association signals. BMI = Body Mass index. SF = Snap Frozen, F = Fresh, IIDP-W = Wisconsin centre, IIDP-P = Pennsylvania centre, IIDP-I = Illinois centre, IIDP-SLI = Scharp Lacy institute, IIDP-M = Miami centre, CICRC - California Islet Cell Resources centre, AIX = AIX Biotech LLC, AMS = AMS Biosciences, NDRI = National Disease Research Interchange.

| Islet identifier      | Study | Age | Sex | BMI | Ethnicity | Diabetes status | Insulin release | HbA1c (%) | Shipped | Isolation Centre |
|-----------------------|-------|-----|-----|-----|-----------|-----------------|-----------------|-----------|---------|------------------|
| AACD168A/UWHI222R     | 1,2   | 36  | F   | 45  | White     | No              | 5.9             | ND        | SF      | IIDP-W           |
| ABHB331               | 1,2   | 43  | M   | 37  | White     | No              | 2.1             | ND        | SF      | IIDP-W           |
| ACB0251/UWHI243R      | 1,2   | 45  | F   | 33  | White     | No              | 2.3             | ND        | SF      | IIDP-W           |
| ACEA213-A/UWHI247R-A  | 1,2   | 53  | F   | 21  | White     | No              | 1.4             | 5.5       | SF      | IIDP-W           |
| ACFO053-A/UWHI248R-A  | 1,2   | 29  | M   | 31  | White     | No              | 2.4             | 5.5       | SF      | IIDP-W           |
| ACJY368/ICRH-86       | 2     | 42  | F   | 23  | White     | No              | ND              | 5.4       | F       | IIDP-P           |
| H539/ACAF253          | 1,2   | 41  | M   | 31  | White     | No              | 1.6             | ND        | SF      | IIDP-I           |
| H546/ACDF368          | 1,2   | 59  | M   | 20  | Afr Amer  | No              | 1.3             | 5.5       | SF      | IIDP-I           |
| H549/ACDW320          | 1,2   | 47  | M   | 36  | Afr Amer  | No              | 0.9             | ND        | SF      | IIDP-I           |
| HP-15016-01A/ACAN292A | 1     | 55  | M   | 33  | White     | No              | 4.2             | 5.9       | SF      | IIDP-SLI         |
| HP-15024-01/ACAV429   | 1     | 25  | M   | 25  | White     | No              | 3.7             | 5.3       | SF      | IIDP-SLI         |
| HP15175               | 1     | 21  | M   | 24  | White     | No              | 1.6             | 5.6       | SF      | IIDP-SLI         |
| HP-15157-01A/ACFC446A | 2     | 27  | M   | 19  | White     | No              | 1.6             | 5.8       | SF      | IIDP-SLI         |
| HP1889                | 1,2   | 37  | M   | 37  | White     | No              | 1               | ND        | SF      | IIDP-M           |
| HP1963                | 1,2   | 55  | F   | 26  | White     | No              | 1.45            | ND        | SF      | IIDP-M           |
| HP1986                | 1,2   | 43  | F   | 30  | White     | No              | 3.66            | ND        | SF      | IIDP-M           |
| HP1995                | 1,2   | 24  | F   | 23  | White     | No              | 3.46            | ND        | SF      | IIDP-M           |
| HP2026                | 2     | 27  | M   | 30  | White     | No              | 6.74            | ND        | SF      | IIDP-M           |
| HP2055                | 1,2   | 44  | F   | 22  | White     | No              | 1.70            | ND        | SF      | IIDP-M           |
| HP2056                | 1,2   | 39  | F   | 30  | Afr Amer  | No              | 3.53            | ND        | SF      | IIDP-M           |
| HP2062                | 1     | 20  | M   | 26  | White     | No              | 1.10            | ND        | SF      | IIDP-M           |
| HP2072                | 1     | 55  | M   | 29  | White     | No              | 2.44            | ND        | SF      | IIDP-M           |
| HP2075                | 1     | 57  | F   | 25  | White     | No              | 4.64            | ND        | SF      | IIDP-M           |
| HP2076                | 1     | 48  | M   | 22  | White     | No              | 4.59            | ND        | SF      | IIDP-M           |

|                  |     |    |   |    |          |    |      |     |    |        |
|------------------|-----|----|---|----|----------|----|------|-----|----|--------|
| HP2079           | 2   | 56 | F | 26 | White    | No | ND   | ND  | SF | IIDP-M |
| HP2080           | 1,2 | 46 | M | 27 | White    | No | 2.15 | ND  | SF | IIDP-M |
| HP2092           | 1   | 51 | F | 26 | White    | No | 4.27 | ND  | SF | IIDP-M |
| HP2095           | 2   | 31 | M | 29 | White    | No | 2.64 | ND  | SF | IIDP-M |
| HP2097           | 1,2 | 61 | F | 32 | White    | No | 4.12 | ND  | SF | IIDP-M |
| HP2098           | 1,2 | 56 | F | 30 | Hispanic | No | 1.81 | ND  | SF | IIDP-M |
| HP2099           | 1,2 | 50 | M | 26 | Hispanic | No | 3.01 | ND  | SF | IIDP-M |
| HP2101           | 1,2 | 20 | M | 24 | Hispanic | No | 2.36 | ND  | SF | IIDP-M |
| HP2103           | 1,2 | 24 | F | 27 | White    | No | 3.36 | ND  | SF | IIDP-M |
| HP2106           | 1,2 | 51 | M | 26 | Afr Amer | No | 4.07 | ND  | SF | IIDP-M |
| HP2116           | 1   | 53 | M | 29 | Hispanic | No | 2.23 | ND  | SF | IIDP-M |
| HP2148           | 1   | 20 | M | 21 | White    | No | 1.5  | ND  | SF | IIDP-M |
| HP2182           | 1,2 | 24 | F | 35 | White    | No | 3.7  | ND  | SF | IIDP-M |
| HP2186           | 1,2 | 19 | M | 20 | White    | No | 1.4  | ND  | SF | IIDP-M |
| HP2187B/ACDL087B | 2   | 42 | M | 37 | Hispanic | No | 7.2  | 5.3 | SF | IIDP-M |
| HP2189           | 1,2 | 64 | F | 25 | White    | No | 2.06 | ND  | SF | IIDP-M |
| HP2191A/ACEK077A | 1,2 | 53 | F | 21 | White    | No | 1.4  | 5.5 | SF | IIDP-M |
| HP2197/ACGK380   | 1,2 | 45 | F | 23 | White    | No | 5    | 5.5 | SF | IIDP-M |
| HP2203/ACHU294   | 1,2 | 17 | M | 22 | White    | No | 1.19 | ND  | SF | IIDP-M |
| HP2204/ACH4140   | 1,2 | 57 | F | 27 | White    | No | 1.9  | 5.3 | SF | IIDP-M |
| Hu779            | 2   | 52 | F | 25 | White    | No | ND   | ND  | SF | CICRC  |
| Hu781            | 2   | 30 | M | 32 | White    | No | ND   | ND  | SF | CICRC  |
| Hu782a           | 2   | 62 | F | 24 | White    | No | ND   | ND  | SF | CICRC  |
| Hu932A/ACAM113A  | 1,2 | 18 | M | 28 | White    | No | 1.8  | 5   | SF | CICRC  |
| Hu943/ACEC298    | 1,2 | 27 | M | 31 | Afr Amer | No | 0.9  | 5.4 | SF | CICRC  |
| Hu945/ACEU273    | 1,2 | 53 | M | 22 | White    | No | 1.5  | 5.5 | SF | CICRC  |
| Hu949/ACFL177    | 1,2 | 39 | M | 29 | White    | No | 1.2  | 5.6 | SF | CICRC  |
| Hu953/ACGX022    | 2   | 57 | F | 28 | White    | No | ND   | 5.5 | SF | CICRC  |
| OD34316          | 2   | 47 | M | 20 | White    | No | ND   | ND  | SF | AIX    |
| OD36812          | 2   | 40 | F | 23 | Afr Amer | No | ND   | ND  | SF | AIX    |
| rHIP81           | 1,2 | 30 | M | 29 | White    | No | 3.58 | ND  | SF | AIX    |
| rHIP82           | 2   | 40 | F | 25 | Asian    | No | 8.2  | ND  | SF | AIX    |
| rHIP83           | 1,2 | 51 | M | 28 | Hispanic | No | 2.5  | ND  | SF | AIX    |
| rHIP85           | 1,2 | 31 | F | 25 | White    | No | 2    | 5.1 | SF | AIX    |
| rHIP87           | 1,2 | 59 | M | 30 | White    | No | 1    | ND  | SF | AIX    |

|                          |     |    |   |    |          |     |      |      |    |          |
|--------------------------|-----|----|---|----|----------|-----|------|------|----|----------|
| rHIP90                   | 1,2 | 32 | M | 44 | Hispanic | No  | 2.53 | 6.3  | SF | AIX      |
| rHIP91                   | 1,2 | 57 | F | 56 | White    | No  | 1.08 | ND   | SF | AIX      |
| rHIP92                   | 1,2 | 27 | M | 25 | Filipino | No  | 1.3  | 4.6  | SF | AIX      |
| rHIP93                   | 1,2 | 22 | M | 25 | Asian    | No  | 2.8  | 5.4  | SF | AIX      |
| ABKO130/Hu926            | 1   | 52 | M | 32 | Hispanic | Yes | 0.30 | 6.70 | F  | CICRC    |
| XIX456/HP10269           | 1   | 43 | M | 27 | Hispanic | Yes | ND   | ND   | SF | IIDP-SLI |
| HP-15085-01T2DA/ACCY386A | 1   | 37 | F | 39 | White    | Yes | 2.80 | 7.30 | SF | IIDP-SLI |
| HP1991                   | 1   | 67 | M | 30 | White    | Yes | 1.54 | ND   | SF | IIDP-M   |
| HP1997                   | 1   | 58 | M | 24 | White    | Yes | ND   | ND   | SF | IIDP-M   |
| HP2020                   | 1   | 65 | F | 31 | Afr Amer | Yes | 1.32 | ND   | SF | IIDP-M   |
| HP2029                   | 1   | 48 | F | 23 | Afr Amer | Yes | 1.37 | ND   | SF | IIDP-M   |
| HP2032                   | 1   | 55 | M | 28 | White    | Yes | 3.77 | ND   | SF | IIDP-M   |
| HP2039                   | 1   | 54 | M | 30 | Hispanic | Yes | ND   | ND   | SF | IIDP-M   |
| HP2043                   | 1   | 65 | M | 33 | White    | Yes | ND   | ND   | SF | IIDP-M   |
| HP2047                   | 1   | 43 | F | 33 | White    | Yes | 3.41 | ND   | SF | IIDP-M   |
| HP2049                   | 1   | 60 | F | 29 | Afr Amer | Yes | ND   | ND   | SF | IIDP-M   |
| HP2067                   | 1   | 64 | F | 33 | White    | Yes | 2.81 | ND   | SF | IIDP-M   |
| HP2069                   | 1   | 53 | F | 31 | Afr Amer | Yes | 5.23 | ND   | SF | IIDP-M   |
| HP2071                   | 1   | 43 | M | 37 | Afr Amer | Yes | 2.73 | ND   | SF | IIDP-M   |
| HP2081                   | 1   | 65 | F | 29 | White    | Yes | 1.50 | ND   | SF | IIDP-M   |
| HP2107                   | 1   | 45 | M | 21 | Afr Amer | Yes | 9.16 | ND   | SF | IIDP-M   |
| ILT092710                | 1   | 54 | F | 53 | Afr Amer | Yes | ND   | ND   | SF | AMS      |
| ILT1106901               | 1   | 42 | M | 32 | White    | Yes | ND   | ND   | SF | AMS      |
| OD35464                  | 1   | 58 | M | 66 | Afr Amer | Yes | ND   | ND   | SF | NDRI     |
