# Supplementary material for: Islet-expressed circular RNAs are associated with type 2 diabetes status in human primary islets and in peripheral blood
Source: PubMed Central journal article supplement (PMC7171860; doi:10.1186/s12920-020-0713-2), 2020-04-20
Supplement: 12920_2020_713_MOESM6_ESM.pdf [file 12920_2020_713_MOESM6_ESM.pdf]

**Supplementary table S4: Islet circRNAs not identified in other tissue types.** These circRNAs have not been previously identified in data from multiple human tissues (multiple brain regions, muscle, thyroid and liver), and multiple cell types (including stem cells, skin and lung fibroblasts, neurons, lung epithelia, hepatocytes, breast cancer cells, lymphocytes, muscle myoblasts, aortic and vascular endothelial cells)

| Backsplice junction | Gene ID              | chromosome     | start        | stop         | raw_count | BPM        |
|---------------------|----------------------|----------------|--------------|--------------|-----------|------------|
| NM_198850.9.5       | PHLDB3               | chr19          | 43998853.00  | 44002028.00  | 16        | 159.213802 |
| NM_173812.16.12     | DPY19L2              | chr12          | 63987866.00  | 64002455.00  | 13        | 129.361214 |
| NM_139025.22.20     | ADAMTS13             | chr9           | 136309983.00 | 136313849.00 | 13        | 129.361214 |
| NM_017935.10.8      | BANK1                | chr4           | 102942670.00 | 102951422.00 | 12        | 119.410352 |
| NR_023386.6.6       | CROCCP3              | chr1           | 16812920.00  | 16813156.00  | 11        | 109.459489 |
| NR_026899.10.5      | ARHGAP27P1-BPTFP1-KP | chr17          | 62750122.00  | 62758828.00  | 10        | 99.5086264 |
| NM_005747.4.3       | CELA3A               | chr1           | 22331939.00  | 22332289.00  | 10        | 99.5086264 |
| NM_052956.11.10     | ACSM1                | chr16          | 20636744.00  | 20638638.00  | 10        | 99.5086264 |
| NM_001146320.4.2    | GRAMD2B              | chr5           | 125801117.00 | 125809060.00 | 9         | 89.5577638 |
| NM_000818.16.4      | GAD2                 | chr10          | 26507971.00  | 26589924.00  | 9         | 89.5577638 |
| NM_182587.46.43     | UNC80                | chr2           | 210805944.00 | 210810667.00 | 9         | 89.5577638 |
| NM_001040092.8.4    | ENPP2                | chr8           | 120628504.00 | 120633759.00 | 9         | 89.5577638 |
| NM_017752.14.13     | TBC1D8B              | chrX           | 106096750.00 | 106097526.00 | 9         | 89.5577638 |
| NM_003428.4.3       | ZNF84                | chrUn_gl000223 | 57230.00     | 58124.00     | 8         | 79.6069011 |
| NM_001004431.2.2    | METRNL               | chr17          | 81042813.00  | 81043199.00  | 8         | 79.6069011 |
| NM_005935.15.13     | AFF1                 | chr4           | 88047250.00  | 88048855.00  | 8         | 79.6069011 |
| NM_032504.6.2       | UNC80                | chr2           | 210637817.00 | 210654329.00 | 6         | 59.7051758 |
| NM_007030.2.2       | TPPP                 | chr5           | 677864.00    | 678179.00    | 6         | 59.7051758 |
| NM_014760.3.3       | TATDN2               | chr3           | 10301820.00  | 10302354.00  | 6         | 59.7051758 |
| NM_001004303.16.12  | FYB2                 | chr1           | 57192169.00  | 57207894.00  | 6         | 59.7051758 |
| NM_181798.6.3       | KCNQ1                | chr11          | 2591857.00   | 2594216.00   | 6         | 59.7051758 |
| NR_003290.8.6       | EP400P1              | chr12          | 132604964.00 | 132606525.00 | 6         | 59.7051758 |
| NM_001278250.3.3    | SLC25A45             | chr11          | 65146846.00  | 65147032.00  | 6         | 59.7051758 |
| NM_173575.11.3      | STK32C               | chr10          | 134022537.00 | 134041632.00 | 4         | 39.8034506 |
| NM_015082.13.9      | FSTL4                | chr5           | 132552920.00 | 132561511.00 | 4         | 39.8034506 |
| NM_000352.4.2       | ABCC8                | chr11          | 17484984.00  | 17496574.00  | 4         | 39.8034506 |

|                  |               |       |              |              |   |            |
|------------------|---------------|-------|--------------|--------------|---|------------|
| NM_182911.19.17  | TSGA10        | chr2  | 99634662.00  | 99636945.00  | 4 | 39.8034506 |
| NR_027300.16.15  | C3P1          | chr19 | 10165922.00  | 10166437.00  | 3 | 29.8525879 |
| NM_138364.4.3    | PRMT9         | chr4  | 148594109.00 | 148595025.00 | 2 | 19.9017253 |
| NM_033049.5.4    | MUC13         | chr3  | 124639080.00 | 124641150.00 | 2 | 19.9017253 |
| NM_001868.4.3    | CPA1          | chr7  | 130021470.00 | 130022050.00 | 2 | 19.9017253 |
| NM_001099409.5.5 | EHBP1L1       | chr11 | 65347551.00  | 65347730.00  | 2 | 19.9017253 |
| NM_001161426.3.2 | NUDT2         | chr19 | 52850959.00  | 52852488.00  | 2 | 19.9017253 |
| NM_194285.3.3    | SPTY2D1       | chr11 | 18636109.00  | 18637645.00  | 2 | 19.9017253 |
| NM_032415.5.3    | CARD11        | chr7  | 2983845.00   | 2987421.00   | 2 | 19.9017253 |
| NM_000492.11.4   | CFTR          | chr7  | 117170952.00 | 117199709.00 | 2 | 19.9017253 |
| NM_005396.6.4    | PNLIPRP2      | chr10 | 118385456.00 | 118387385.00 | 1 | 9.95086264 |
| NM_001202425.3.2 | ZNF559-ZNF177 | chr19 | 9475537.00   | 9482428.00   | 1 | 9.95086264 |
| NM_014907.9.6    | FRMPD1        | chr9  | 37719065.00  | 37731100.00  | 1 | 9.95086264 |
| NR_027460.4.2    | RRN3P3        | chr16 | 22444046.00  | 22447133.00  | 1 | 9.95086264 |
| NR_029410.5.4    | LOC389765     | chr9  | 88444377.00  | 88445491.00  | 1 | 9.95086264 |
| NM_173481.3.2    | MISP          | chr19 | 756889.00    | 760039.00    | 1 | 9.95086264 |
| NM_031481.7.3    | SLC25A18      | chr22 | 18062510.00  | 18066300.00  | 1 | 9.95086264 |
| NM_005400.13.12  | PRKCE         | chr2  | 46372231.00  | 46378368.00  | 1 | 9.95086264 |
| NM_001278722.5.2 | IL20RA        | chr6  | 137329735.00 | 137338240.00 | 1 | 9.95086264 |
| NM_001127384.5.2 | CTNNA3        | chr10 | 69281599.00  | 69407276.00  | 1 | 9.95086264 |
| NM_005656.5.4    | TMPRSS2       | chr21 | 42860320.00  | 42861520.00  | 1 | 9.95086264 |
